# Supplementary material for: Interaction of graphene oxide with tannic acid: computational modeling and toxicity mitigation in C. elegans
Source: Beilstein J Nanotechnol. 2024 Oct 30;15:1297–311. doi: 10.3762/bjnano.15.105 (PMC11533115; doi:10.3762/bjnano.15.105)
Supplement: File 1 — Supplementary material. [file Beilstein_J_Nanotechnol-15-1297-s001.pdf]

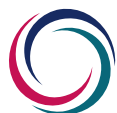

## Supporting Information

for

### **Interaction of graphene oxide with tannic acid: computational modeling and toxicity mitigation in *C. elegans***

Romana Petry, James M. de Almeida, Francine Côa, Felipe Crasto de Lima, Diego Stéfani T. Martinez and Adalberto Fazzio

*Beilstein J. Nanotechnol.* **2024**, *15*, 1297–1311. doi:10.3762/bjnano.15.105

## Supplementary material

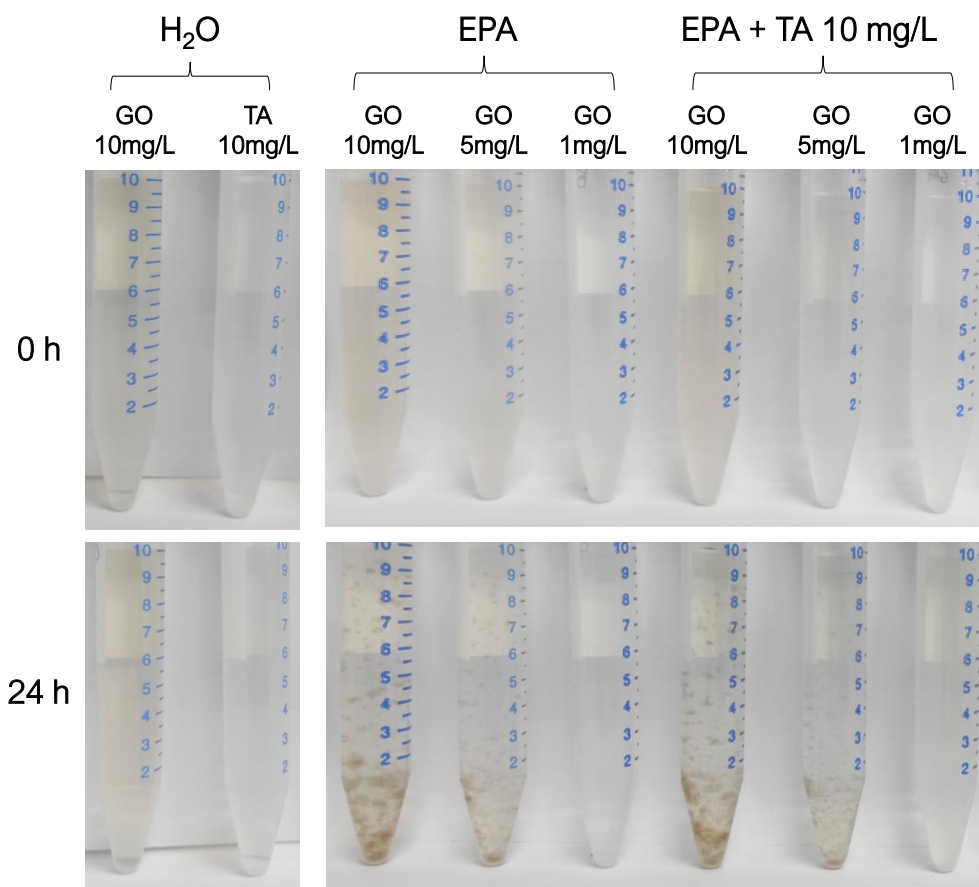

**Figure S1:** Colloidal stability assay of 1.0, 5.0 and 10 mg·L<sup>-1</sup> GO suspensions in EPA medium with and without the presence of 10 mg·L<sup>-1</sup> of tannic acid. The GO suspension of 10 mg·L<sup>-1</sup> in ultrapure water is used as a stable control. Also, a 10 mg·L<sup>-1</sup> TA solution was monitored for precipitation or change of color.

**Table S1:** Monitoring of colloidal stability by DLS of 10 mg·L<sup>-1</sup> GO suspensions in EPA medium with and without the presence of 10 mg·L<sup>-1</sup> or 20 mg·L<sup>-1</sup> of tannic acid. HD: hydrodynamic diameter, PDI: polydispersivity index, TA10: 10 mg·L<sup>-1</sup> of tannic acid, TA20: 20 mg·L<sup>-1</sup> of tannic acid.

| Sample             | 0 hours      |       | 3 hours        |       | 24 hours       |       |
|--------------------|--------------|-------|----------------|-------|----------------|-------|
|                    | HD (nm)      | PDI   | HD (nm)        | PDI   | HD (nm)        | PDI   |
| <b>GO+H2O</b>      | 86.4 ± 3.7   | 0.245 | 84.7 ± 3.8     | 0.252 | 85.3 ± 2.3     | 0.251 |
| <b>GO+EPA</b>      | 182 ± 15.6   | 0.314 | 2313.2 ± 248.7 | 0.954 | 3811.2 ± 1064  | 1.429 |
| <b>GO+TA10+EPA</b> | 115.3 ± 20.3 | 0.284 | 1675.4 ± 208.8 | 0.812 | 3421.2 ± 733.0 | 1.403 |
| <b>GO+TA20+EPA</b> | 149.9 ± 35.4 | 0.338 | 552.1 ± 196.2  | 0.585 | 2574.7 ± 681.5 | 1.190 |

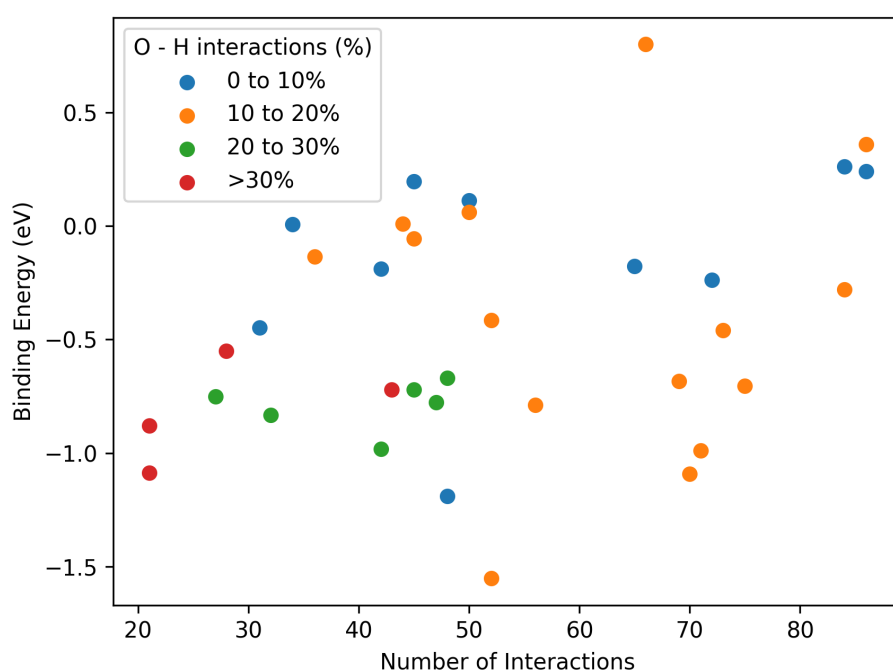

**Figure S2:** Relation between binding energy and the number of interacting atoms in the interface of GO and TA. The colors represent the percentage of interactions that occur between O and H atoms.

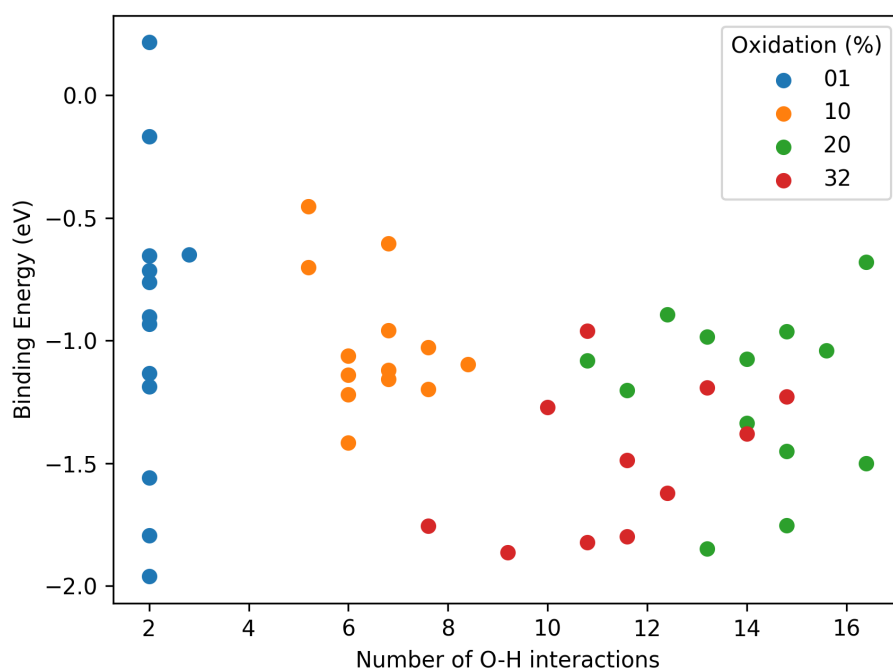

**Figure S3:** Relation between binding energy and the number of O-H interacting atoms in the interface of GO and TA. The colors represent GO's surface oxidation.
